# Supplementary material
Source: PubMed Central journal article supplement (PMC4492379)
Supplement: 10.1534_115.177063_genetics.115.177063-2.pdf [file 10.1534_115.177063_genetics.115.177063-2.pdf]

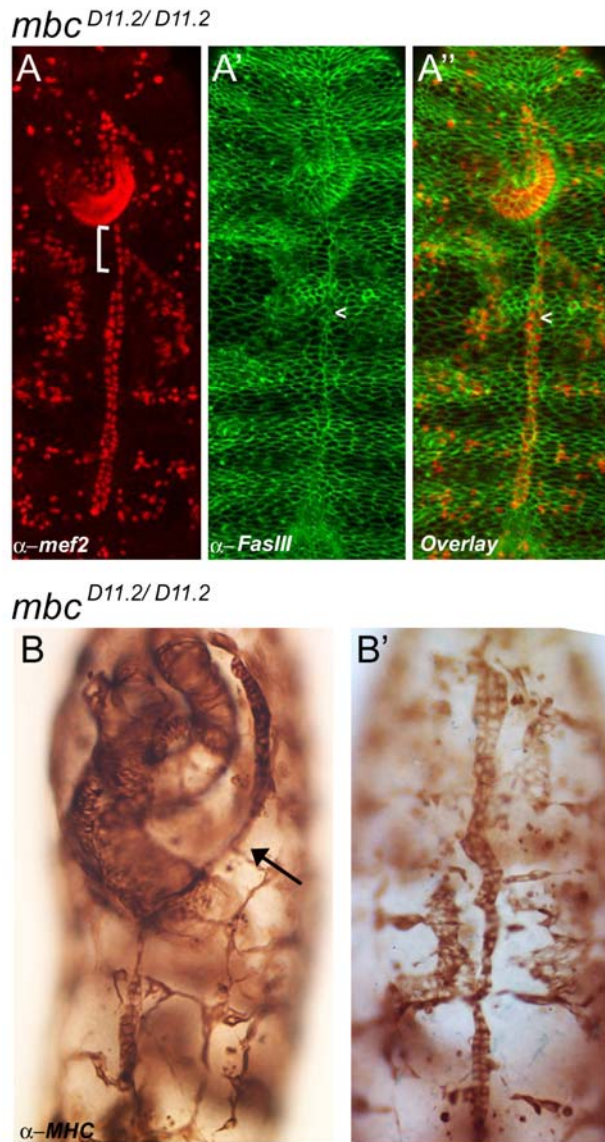

**Figure S2** Dorsal closure in mutants with defective dorsal vessel development. (A-B') St. 17 mutant embryos stained fluorescently (A-A'') or colorimetrically (B, B') to view the dorsal vessel and overlying epidermis. (A-B') *mbc<sup>D11.2/D11.2</sup>* mutant embryos to examine dorsal closure and dorsal vessel defects. The majority of embryos (90%) do not exhibit dorsal closure defects as visualized by FasIII (green), but still exhibit defects in dv patterning (Mef2 in red; bracket). (B) Approximately 10% of *mbc* mutants show dorsal closure defects. If this occurred, the cardioblasts did not migrate to the midline (arrow; compare to the midline pairing of cardioblasts in B'). Embryos that showed dorsal closure defects were not included in our phenotypic or quantitative analysis of dv phenotypes.
